# Supplementary material for: A role for the dynamin-like protein Vps1 during endocytosis in yeast
Source: Oxford University Press journal article supplement (doi:10.1242/jcs.070508), 2010-09-14
Supplement: jcs070508tables1.pdf [file jcs070508tables1.pdf]

**Supplementary table 1. Yeast strains used in this study**

| Strain Number | Genotype                                                                                                                                                           | Notes              |
|---------------|--------------------------------------------------------------------------------------------------------------------------------------------------------------------|--------------------|
| KAY1450       | <i>MAT<math>\alpha</math> pep4::HIS3 prbl-AI.6R HIS3 lys2-208 trpl-<math>\Delta</math>101 ura3-52 gal2 can1 Vps1Gly<sub>6</sub>GFP::KanMx-loxP</i>                 | Peters et al, 2004 |
| KAY1470       | <i>MAT<math>\alpha</math> his3-<math>\Delta</math>200, leu2-3/112, ura3-52, trp1-1 Abp1mRFP::HIS3</i>                                                              | This study         |
| KAY870        | <i>MAT<math>\alpha</math> his3-<math>\Delta</math>200, leu2-3/112, ura3-52 Sla1-mRFP::HIS3</i>                                                                     | This study         |
| KAY1492       | <i>MAT a/<math>\alpha</math> KAY1450 x KAY1470</i>                                                                                                                 | This study         |
| KAY1493       | <i>MAT a/ <math>\alpha</math> KAY1450 x KAY870</i>                                                                                                                 | This study         |
| KAY684        | <i>MAT<math>\alpha</math> SAC6-RFP::kanMX, his3<math>\Delta</math>1, leu2<math>\Delta</math>0, lys2<math>\Delta</math>0, ura3<math>\Delta</math>0</i>              | Huh et al, 2003    |
| KAY1368       | <i>KAY684 <math>\Delta</math>vps1::LEU2</i>                                                                                                                        | This study         |
| KAY723        | <i>MAT<math>\alpha</math> SLA2-GFP::HIS3, his3<math>\Delta</math>1, leu2<math>\Delta</math>0, met15<math>\Delta</math>0, ura3<math>\Delta</math>0</i>              | Invitrogen         |
| KAY1459       | <i>KAY723 <math>\Delta</math>vps1::LEU2</i>                                                                                                                        | This study         |
| KAY1320       | <i>MAT<math>\alpha</math> ENT1-GFP::HIS3, his3<math>\Delta</math>1, leu2<math>\Delta</math>0, met15<math>\Delta</math>0, ura3<math>\Delta</math>0</i>              | Invitrogen         |
| KAY1460       | <i>KAY1320 <math>\Delta</math>vps1::LEU2</i>                                                                                                                       | This study         |
| KAY757        | <i>MAT<math>\alpha</math> LAS17-GFP::HIS3, his3<math>\Delta</math>1, leu2<math>\Delta</math>0, met15<math>\Delta</math>0, ura3<math>\Delta</math>0</i>             | Invitrogen         |
| KAY1370       | <i>KAY757 <math>\Delta</math>vps1::LEU2</i>                                                                                                                        | This study         |
| KAY726        | <i>MAT<math>\alpha</math> Rvs167-GFP::HIS3, his3<math>\Delta</math>1, leu2<math>\Delta</math>0, met15<math>\Delta</math>0, ura3<math>\Delta</math>0</i>            | Invitrogen         |
| KAY1337       | <i>KAY726 <math>\Delta</math>vps1::LEU2</i>                                                                                                                        | This study         |
| BY4741        | <i>MAT<math>\alpha</math> his3<math>\Delta</math>1, leu2<math>\Delta</math>0, met15<math>\Delta</math>0, ura3<math>\Delta</math>0</i>                              | Invitrogen         |
| BY4742        | <i>MAT<math>\alpha</math> his3<math>\Delta</math>1, leu2<math>\Delta</math>0, lys2<math>\Delta</math>, ura3<math>\Delta</math>0</i>                                | Invitrogen         |
| KAY1095       | <i>MAT<math>\alpha</math> his3<math>\Delta</math>1, leu2<math>\Delta</math>0, lys2<math>\Delta</math>, ura3<math>\Delta</math>0 <math>\Delta</math>vps1::KanMx</i> | Invitrogen         |
| KAY1098       | <i>BY4742 <math>\Delta</math>rvs167::LEU2</i>                                                                                                                      | This study         |
| KAY1100       | <i>KAY1095 <math>\Delta</math>rvs167::LEU2</i>                                                                                                                     | This study         |
| KAY1096       | <i>BY4742 <math>\Delta</math>dnm1::KanMx <math>\Delta</math>vps1::HIS5</i>                                                                                         | EH lab             |
| KAY1462       | <i>BY4742 + integrated GFP-Snc1-SUC2 URA</i>                                                                                                                       | This study         |
| KAY1535       | <i>MAT<math>\alpha</math> his3-<math>\Delta</math>200, leu2-3/112, ura3-52, trp1-1 Rvs167-mRFP</i>                                                                 | This study         |
| KAY1536       | <i>KAY1450 x KAY1535</i>                                                                                                                                           |                    |
