# Supplementary material for: A role for the dynamin-like protein Vps1 during endocytosis in yeast
Source: Oxford University Press journal article supplement (doi:10.1242/jcs.070508), 2010-09-14
Supplement: jcs070508tables2.pdf [file jcs070508tables2.pdf]

**Supplementary Table 2. Plasmids used in this study**

| Plasmid number | Description                                             | Origin/Reference      |
|----------------|---------------------------------------------------------|-----------------------|
| pKA474         | For LEU marked gene deletion                            | Drubin (Berkeley)     |
| pKA88          | Abp1GFP URA                                             | Doyle & Botstein 1996 |
| pHB4           | SUC2 5'UTR-ADHpr-NATR-GFP-SNC1-SUC2 (GSS; ADH promoter) | Burston et al, 2009   |
| pEH318/pKA544  | URA, CEN with PGKterm                                   | EH lab                |
| pKA677         | pKA544+ <i>VPS1</i> (inc 320bp 5')                      | This study            |
| pKA690         | pKA544+ <i>vps1</i> F585L                               | This study            |
| pKA692         | pKA544+ <i>vps1</i> S43N                                | This study            |
| pKA693         | pKA544+ <i>vps1</i> R684A                               | This study            |
| pKA697         | pKA544+ <i>vps1</i> G188S                               | This study            |
| pKA698         | pKA544+ <i>vps1</i> G315D                               | This study            |
| pKA699         | pKA544+ <i>vps1</i> T63A                                | This study            |
| pKA700         | pKA544+ <i>vps1</i> T183Q                               | This study            |
| pKA701         | pKA544+ <i>vps1</i> I649K                               | This study            |
| pKA702         | pKA544+ <i>vps1</i> K653A                               | This study            |
| pKA703         | pKA544+ <i>vps1</i> K689A                               | This study            |
| pKA704         | pKA544+ <i>vps1</i> T183Q, G315D                        | This study            |
| pKA707         | pKA544+ <i>vps1</i> R64C                                | This study            |
